## Multi-animal behavioral tracking and environmental reconstruction using drones and computer vision in the wild

Benjamin Koger<sup>1,2,3</sup>, Adwait Deshpande<sup>1,2,3</sup>, Jeffrey T. Kerby<sup>4,5,6</sup>, Jacob M. Graving<sup>7,1,2,3</sup>, Blair R. Costelloe<sup>1,2,3#</sup>, Iain D. Couzin<sup>1,2,3#</sup>

1. Department of Collective Behavior, Max Planck Institute of Animal Behavior, Konstanz, Germany
2. Centre for the Advanced Study of Collective Behaviour, University of Konstanz, Konstanz, Germany.
3. Department of Biology, University of Konstanz, Konstanz, Germany.
4. Aarhus Institute of Advanced Studies, Aarhus University, Aarhus, Denmark.
5. Neukom Institute for Computational Science, Dartmouth College, Hanover, USA.
6. Department of Bioscience, Aarhus University, Aarhus, Denmark.
7. Advanced Research Technology Unit, Max Planck Institute of Animal Behavior, Konstanz, Germany

# Co-senior authors

**Corresponding authors:** B. Koger ([benkoger@gmail.com](mailto:benkoger@gmail.com)) and I.D. Couzin ([icouzin@ab.mpg.de](mailto:icouzin@ab.mpg.de))

**Keywords:** behavioral tracking, computer vision, drones, environmental reconstruction, gelada monkey, pose, posture, video analysis, wildlife, zebra,

## 1 **Abstract**

2

3 1. Methods for collecting animal behavior data in natural environments, such as direct  
4 observation and bio-logging, are typically limited in spatiotemporal resolution, the  
5 number of animals that can be observed, and information about animals' social and  
6 physical environments.

7 2. Video imagery can capture rich information about animals and their environments,  
8 but image-based approaches are often impractical due to the challenges of  
9 processing large and complex multi-image datasets and transforming resulting data,  
10 such as animals' locations, into geographic coordinates.

11 3. We demonstrate a new system for studying behavior in the wild that uses drone-  
12 recorded videos and computer vision approaches to automatically track the location  
13 and body posture of free-roaming animals in georeferenced coordinates with high  
14 spatiotemporal resolution embedded in contemporaneous 3D landscape models of  
15 the surrounding area.

16 4. We provide two worked examples in which we apply this approach to videos of  
17 gelada monkeys and multiple species of group-living African ungulates. We  
18 demonstrate how to track multiple animals simultaneously, classify individuals by  
19 species and age-sex class, estimate individuals' body postures (poses), and extract  
20 environmental features, including topography of the landscape and game trails.

21 5. By quantifying animal movement and posture, while simultaneously reconstructing a  
22 detailed 3D model of the landscape, our approach opens the door to studying the  
23 sensory ecology and decision-making of animals within their natural physical and  
24 social environments.

25

26

## 27 **Introduction**

28

29           Studying animals in the wild is essential for understanding how they behave within,  
30 and are shaped by, the environments in which they have evolved. Animal behavior impacts,  
31 and is impacted by, biological processes across vast scales, from the neural, genetic and  
32 endocrine interactions within organisms to the emergent functional complexity of groups,  
33 populations and ecosystems. Furthermore, we are in the midst of a biodiversity crisis  
34 (Ceballos et al., 2020), which has created an urgent need to understand how the decisions,  
35 movements, and, ultimately, the fitness of organisms are influenced by anthropogenic  
36 impacts and environmental change.

37           Historically, studies of animal behavioral ecology have relied on direct observation by  
38 humans (Altmann, 1974), an approach that remains foundational today, but also has  
39 inherent limitations. For example, humans' attention capacity constrains the spatial and  
40 temporal resolution of the data they can collect, the number of animals they can observe,  
41 and the duration of observations (Dell et al., 2014). Data collected via human observation is  
42 also prone to observer bias and subjective classification (Tuytens et al., 2014), issues that  
43 cannot be resolved without an objective record of behavior. Video recording allows  
44 researchers to preserve a less biased record and extract more detailed data than is possible  
45 via direct observation. However, manually scoring behavior from video footage is also  
46 subjective and time-consuming, which introduces errors, and limits scalability (Dell et al.,  
47 2014).

48           Major advances in sensor, battery, and communications technologies over the past  
49 two decades have led to the rapid development of animal-borne data-logging devices,  
50 known as bio-loggers. Bio-logging has become a powerful approach for studying behavior,  
51 allowing scientists to collect data over expansive spatial and temporal scales and from  
52 inaccessible environments (Brown et al., 2013; Kays et al., 2015). This approach has  
53 generated important insights into behaviors that were previously difficult or impossible to

54 study effectively, including migration (Jesmer et al., 2018), dispersal (Klarevas-Irby et al.,  
55 2021), energetics (Flack et al., 2020; Williams et al., 2014), sleep (Loftus et al., 2022;  
56 Rattenborg et al., 2016), and individual and collective decision-making (Flack et al., 2018;  
57 Strandburg-Peshkin et al., 2015, 2017).

58         A key challenge of bio-logging is understanding the behavioral states and  
59 contemporaneous social and environmental factors that give rise to animal movements.  
60 Secondary sensors affixed to tags can provide context for geolocation data (Williams et al.,  
61 2020), but are themselves limited. For example, accelerometers are commonly used to  
62 record stereotyped behavioral states such as resting, feeding, and locomotion, but generally  
63 cannot capture more complete behavioral repertoires (Brown et al., 2013). On-board  
64 cameras can record the social interactions, foraging decisions, and physical surroundings of  
65 instrumented individuals, but are restricted in their fields of view and prone to occlusion  
66 (Ehlers et al., 2021; Naganuma et al., 2021). Interpreting data from secondary sensors can  
67 also be challenging. Translation of accelerometer data to human-recognizable behavioral  
68 labels requires validation through synchronous acceleration logging and visual observation.  
69 This is time-consuming and often conducted using captive animals or relatively brief  
70 observations of wild animals, which is likely to exclude rare or context-dependent behaviors  
71 (Brown et al., 2013; Wang et al., 2015). Data from animal-borne cameras typically must be  
72 manually reviewed by experts, and variable image quality can prevent extraction of relevant  
73 data (Moll et al., 2007; Naganuma et al., 2021). Alternatively, social behavior can be studied  
74 by instrumenting most or all animals of interest (e.g. Strandburg-Peshkin et al., 2017), but  
75 this approach is costly, logistically challenging and not viable for species with unstable group  
76 composition (Hughey et al., 2018). To understand environmental context, movement data  
77 can be fused with external data streams, such as meteorological records or satellite and  
78 drone imagery (Benitez-Paez et al., 2021; Strandburg-Peshkin et al., 2017); however, these



79 data are typically asynchronous with behavioral data or too coarse-grained for analysis at  
80 finer scales (Brum-Bastos et al., 2020).

81         Beyond scientific constraints, bio-logging presents other ethical, financial, and  
82 logistical limitations. These include the expense of the devices, costs of remote data  
83 transmission, logistics of capturing animals, and potential reduced fitness of instrumented  
84 individuals (Hughey et al., 2018; Murray & Fuller, 2000). Consequently, the costs of  
85 equipment and potential impact of instrumentation on animals means that, outside of well-  
86 funded research initiatives, bio-logging studies typically have small sample sizes and are  
87 rarely replicated over time or across populations.

88         Video-based observation, in combination with vision-based machine learning tools, is  
89 an emerging approach and an alternative to bio-logging for studying animals in the wild  
90 (Hughey et al., 2018; Tuia et al., 2022). These methods originated in laboratory settings,  
91 where physical on-animal markers and controlled recording conditions enabled early  
92 automated movement tracking solutions (reviewed in Dell et al., 2014). However, field  
93 settings pose significant challenges for conventional vision-based tracking solutions due to  
94 the variable lighting conditions and complex visual scenes inherent to natural environments.  
95 Recent increases in computational processing power and efficiency, and advances in deep  
96 learning techniques, have transformed automated vision-based tools in field settings (Zhao  
97 et al., 2019). Still, these methods are technically complex and require expert knowledge for  
98 successful implementation.

99         Similar to the overhead imaging common in many laboratory-based animal tracking  
100 paradigms (Buhl et al., 2006; Katz et al., 2011), drones mounted with high resolution  
101 cameras allow for efficient top down filming that enables precise quantification of animal  
102 positions and reduces occlusion by environmental features or other group members (e.g.  
103 Inoue et al., 2019; Torney et al., 2018). Modern consumer imaging drones are affordable  
104 and easy to pilot. Drones' mobility makes them a particularly powerful platform for field

105 observations because they can be used to film free-roaming animals as they move around  
106 the landscape. However, this camera motion becomes a major source of error that must be  
107 accounted for (Haalck et al., 2020). The topography of natural landscapes also introduces  
108 challenges in accurately projecting 2D image coordinates into 3D space in standard units.  
109 While multi-camera 3D imaging can surmount these issues, they are logistically and  
110 computationally difficult to deploy (Francisco et al., 2020). Therefore, previous drone-based  
111 behavioral studies have typically relied on approaches like manually processing videos  
112 (Sprogis et al., 2020), analyzing a subset of still frames (Inoue et al., 2019), approximating  
113 animal movement paths using the drone's position (Raoult et al., 2018), or recording  
114 trajectories in relation to the video frame dimensions rather than geographic coordinate  
115 systems (Ringhofer et al., 2020; Torney et al., 2018).

116         Here we describe a method for using aerial video and computer vision to collect high-  
117 resolution georeferenced locational and behavioral data on free-ranging animals without  
118 capturing or tagging them. In our approach, we use drones to record overhead video of focal  
119 animals and subsequently use a deep learning-based pipeline to automatically locate and  
120 track all individuals in the video. We use Structure-from-Motion (SfM) techniques to  
121 reconstruct the 3D topography of the surrounding habitat (D'Urban Jackson et al., 2020)  
122 which, combined with further image processing, can accurately transform animal movement  
123 data into geographic coordinate systems independent of camera movement. We  
124 simultaneously generate additional behavioral and environmental information, including  
125 estimates of each animal's body posture (pose) and landscape features such as game trails.  
126 This method, illustrated in Fig. 1, is applicable to a wide range of species, generates  
127 behavioral data at sub-second and sub-meter resolution, and produces synchronous  
128 information about the surrounding physical and biotic environment. The use of inexpensive  
129 consumer drones, that can be flexibly redeployed, greatly reduces the cost of data collection  
130 relative to bio-logging, and promotes larger sample sizes and replication of studies. Although

131 not without its own limitations (see *Limitations and Considerations*), this approach has many  
132 advantages that make it a powerful alternative or complement to current methodologies. Our  
133 approach thus has the potential to broaden the scope of behavioral ecology to encompass  
134 questions and systems that are unsuitable for direct observation or bio-logging approaches  
135 in isolation.

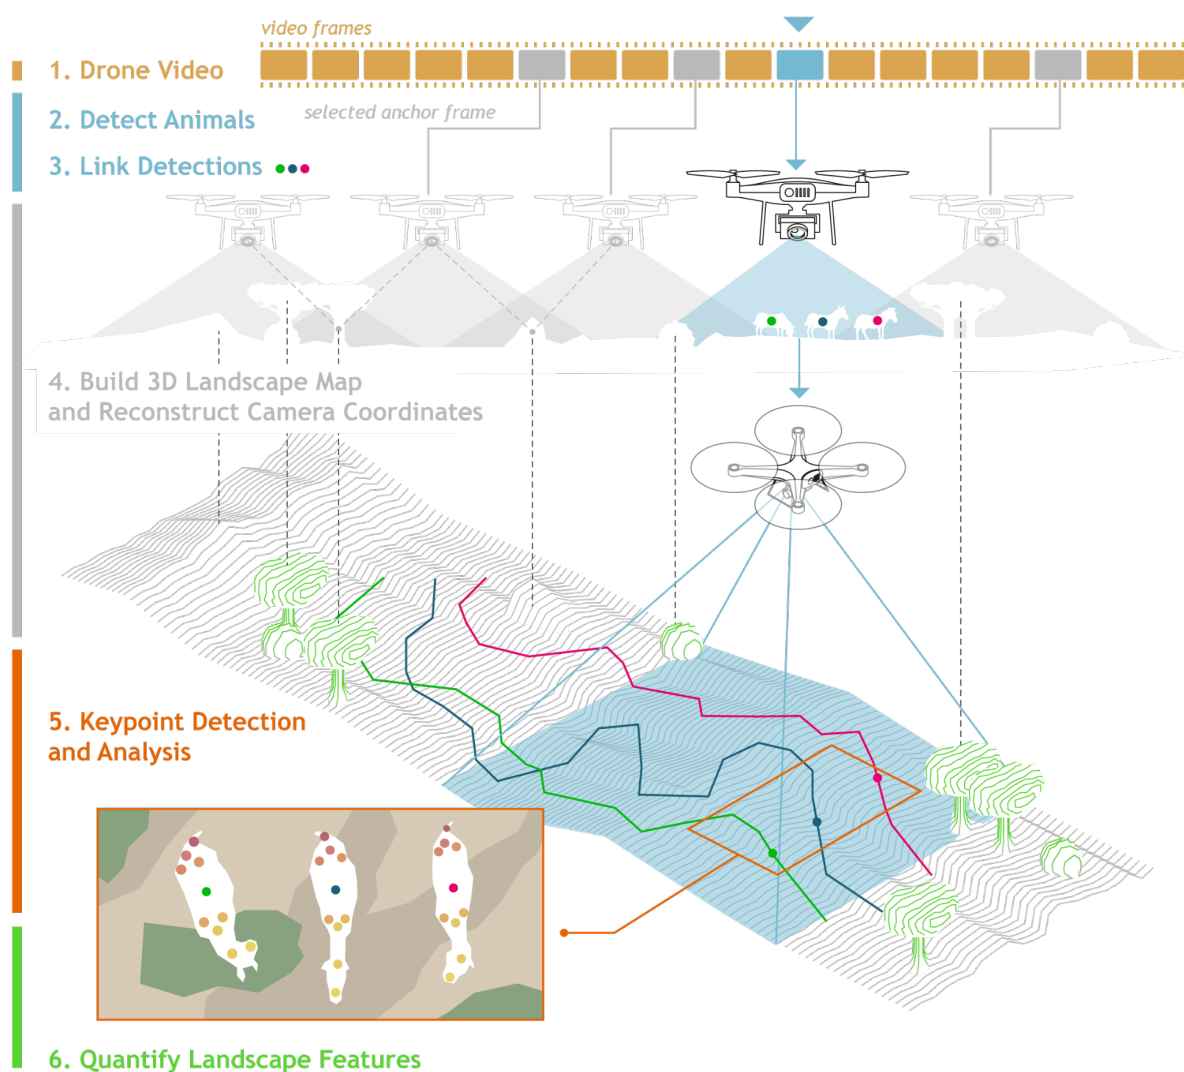

144 anchor frames and local visual features are combined to estimate camera locations for all frames  
145 allowing the transformation of the animal trajectories from Step 3 into geographic coordinate space  
146 (Step 4). Optionally, further analyses can be performed to extract more detailed behavioral and  
147 landscape information, for example through keypoint detection (Step 5) and landscape feature  
148 detection (Step 6).

149

## 150 **Methods**

151

152 Below we outline the major steps of our methodological approach (Fig. 1). Full details of  
153 each step are given in the Supplement. To illustrate our processing pipeline, we provide two  
154 worked examples with complete code and data available on GitHub  
155 (<https://github.com/benkoger/overhead-video-worked-examples>). We encourage readers to  
156 explore these examples and to modify the code for their own datasets.

157         In the first example, we apply our method to multiple African ungulate species. We  
158 recorded ungulate groups at Ol Pejeta and Mpala Conservancies in Laikipia, Kenya over two  
159 field seasons, from November 2 to 16, 2017 and from March 30 to April 19, 2018. In total,  
160 we recorded thirteen species, but here we focus our analyses on the endangered Grevy's  
161 zebra (*Equus grevyi*) (Rubenstein et al., 2016). We used DJI Phantom 4 Pro drones [DJI,  
162 Shenzhen, China], and deployed two drones sequentially in overlapping relays to achieve  
163 continuous observations longer than a single battery duration. Our method is agnostic to the  
164 exact drone-type used, and is scalable to the higher-resolution video made possible by  
165 employing more recent models.

166         In the second worked example, we process video recordings of grassland-dwelling  
167 gelada monkeys (*Theropithecus gelada*). Aerial video recordings of gelada monkeys were  
168 provided by the Guassa Gelada Research Project. The recordings were collected between  
169 October 16, 2019 and February 28, 2020 at the Guassa Community Conservation Area in  
170 the Ethiopian highlands. Geladas were recorded with a DJI Mavic 2 Pro [DJI, Shenzhen,  
171 China].

172           In each worked example, we generate movement trajectories for each animal in the  
173 example videos and 3D models of the surrounding landscape. In the ungulate example, we  
174 also track body keypoints and analyze landscape imagery to detect game trails, which  
175 zebras tend to follow while moving across the landscape. For the geladas, we train our  
176 detection model (Step 2), to distinguish between adult males and other individuals.

177

### 178 *Step 1. Video Recording*

179

180 Videos should be recorded from above the animals of interest with the camera pointing  
181 directly down. The visibility of the animals is of vital importance and will be affected by the  
182 habitat type, video resolution and characteristics of the animals themselves. As a general  
183 rule, videos in which the animals are easily detectable by humans will significantly ease  
184 processing. Although any camera platform can be used to capture the footage, drone-  
185 mounted cameras will likely be the most common approach and subsequently we use  
186 “drone” and “camera” interchangeably. For specific points to consider when planning drone-  
187 based data collection, see *Limitations and Considerations*, below and *Step 1* in the  
188 Supplement.

189

### 190 *Step 2. Detection*

191

192 Animal detection and localization in each video frame is accomplished with deep  
193 convolutional neural networks (CNNs), which we build, train and deploy to predict localizing  
194 **bounding boxes** (see Table 1 for definitions of bolded terms) for all individuals in all frames  
195 of each video. We first manually annotate frames from the video footage to build image sets  
196 for training the model and evaluating its performance. **Annotation** can be tedious, and the  
197 content of the images will strongly affect model performance; therefore, it is important to  
198 carefully consider the best annotation strategy to achieve high information value for each

199 annotation while minimizing human labor (see Supplement section 2.1). Users can improve  
200 the efficiency of the annotation process via **model-assisted labeling** and **active learning**  
201 techniques, which concentrate annotation effort on examples that are particularly  
202 challenging for the model to detect.

203         To train a deep learning-based object detection model, researchers must first choose  
204 an appropriate software framework and a specific model to train within that framework (see  
205 Supplement section 2.2). We use the Detectron2 API within the PyTorch framework (Paszke  
206 et al., 2019; Wu et al., 2019) in our worked examples, but the user may choose a different  
207 framework depending on their level of coding proficiency or prior experience with other  
208 programming libraries. For simple use cases with clearly-visible individuals, many common  
209 models can be readily re-configured for the researchers' data. Users with more challenging  
210 footage may need to make more considered choices and in some cases move towards  
211 incorporating more recent high-performance algorithms. Generally, users should choose  
212 models that have been **pretrained** on general image datasets and that incorporate **image**  
213 **augmentation**, as these steps increase training efficiency and require smaller annotated  
214 training sets. See Table S1 for annotation statistics and model performance metrics for the  
215 datasets and trained models used in the worked examples.

216         After the model is trained, all frames from all videos can be automatically processed.  
217 For each video frame the model generates bounding box coordinates, predicted object  
218 classes and confidence scores for every detected object (Fig. 2). We initially take the mean  
219 of the coordinates of the bounding box corners as an individual's location in the frame, which  
220 we subsequently use for tracking.

221



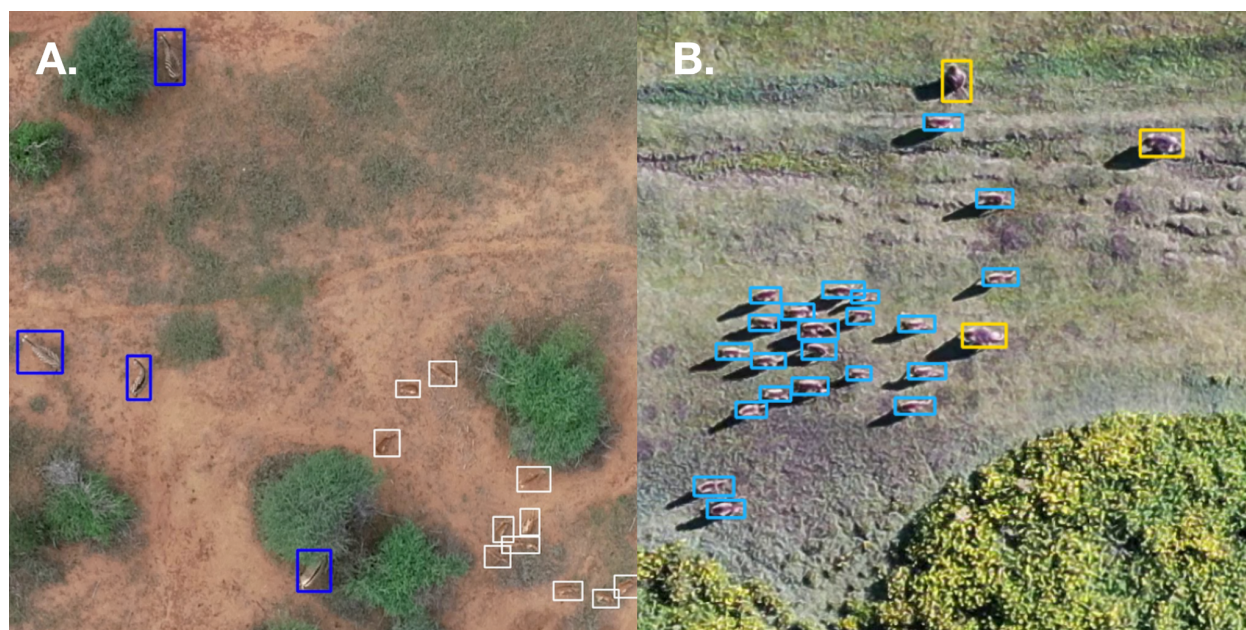

222

223 **Figure 2. Predicted bounding boxes for two example video frames using the trained models**  
224 **from our worked examples.** A) In the ungulates example, the model distinguishes between five  
225 classes (zebra, impala, buffalo, waterbuck, and other). The animals in dark blue bounding boxes are  
226 Grevy's (*Equus grevyi*) and plains zebras (*E. burchelli*) and animals in white bounding boxes are  
227 impala (*Aepyceros melampus*). B) In the gelada monkey example, we distinguish between species  
228 and age-sex class (human-observer, adult-male gelada, and other-gelada). Yellow boxes are  
229 predicted adult-males while light blue boxes are a mix of females and juveniles.

230

### 231 *Step 3. Tracking*

232

233 Tracking, or linking positions across video frames, allows us to generate trajectories for all  
234 detected individuals in the pixel coordinate system of the video. To match individual  
235 locations across consecutive frames, we use a modified version of the Hungarian algorithm  
236 (Kuhn, 1955), which finds the pairing of trajectories and new positions that minimizes the  
237 total distance between all pairs. We have incorporated additional distance- and time-based  
238 rules for connecting detections to tracks that make the algorithm more robust to missing or  
239 false detections by the detection model or from individuals entering or leaving the camera's  
240 field of view during the observation (see Step 3, in the Supplement).

241 The initial process of linking positions is automated but can result in multiple partial  
242 trajectories for a single individual in the case of environmental occlusions and other  
243 detection issues. For these instances, we provide a **graphical user interface (GUI)** for easy  
244 track validation and error correction. This allows the user to obtain, with limited manual  
245 effort, human-verified continuous trajectories of all individuals in each video within the pixel-  
246 based coordinate system of the video frame, which can then be transformed to a geographic  
247 coordinate system.

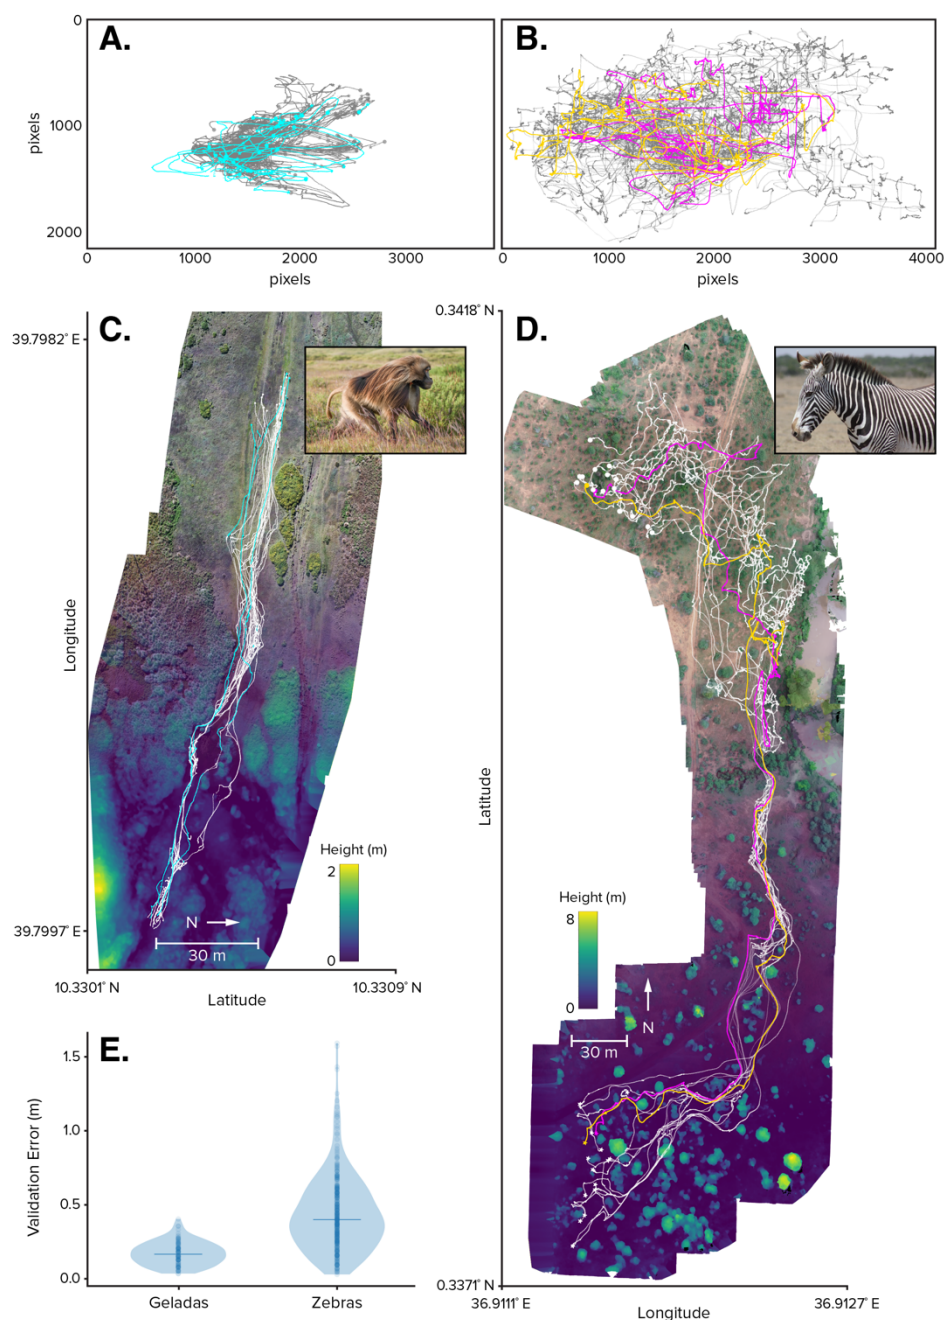

248



249 **Figure 3. Trajectories extracted from drone videos.** Trajectories of A) a gelada monkey group over  
250 a period of 5 minutes and B) a Grevy's zebra herd over a period of 50 minutes, 24 seconds plotted in  
251 video coordinates. Drone and animal movement are entangled and the position of the animals on the  
252 earth is unknown. In C) and D), the same trajectories are plotted in geographic coordinates and  
253 embedded in a reconstructed landscape. The landscape reconstruction includes visual information  
254 (top) as well as topographic information (bottom). E) The trajectories have submeter human-validated  
255 error between observed locations in video frames and embedded map locations (0.17m median,  
256 interquartile range 0.11-0.23m from 100 validated gelada locations; 0.40m median, interquartile range  
257 0.26m-0.58m from 350 validated zebra locations). In A and C, light blue tracks denote adult male  
258 geladas. In B and D, two tracks are highlighted in yellow and pink for easier comparison. In E, the  
259 horizontal line shows the median.

260

#### 261 *Step 4. Landscape Reconstruction and Geographic Coordinate Transformation*

262

263 Transforming trajectories into precise geographic coordinates allows us to disentangle the  
264 movement of the tracked animals over variable terrain and the movement of the drone (Fig.  
265 3), and also allows the user to analyze the resulting movement data in standard units and in  
266 relation to external georeferenced data sources, such as satellite imagery. To achieve an  
267 accurate transformation, we must estimate the topography of the landscape over which the  
268 animals are moving and the location of the camera relative to that landscape (Fig. 4). We  
269 obtain this information by feeding a subset of frames ("**anchor frames**") from each video into  
270 **Structure-from-Motion (SfM)** software (Supplement section 4.1). This builds a detailed 3D  
271 model of the landscape surrounding each observation and also calculates the location of the  
272 camera when each anchor frame was captured. To accurately locate and scale the model in  
273 geographic space, we georeference it using either **ground control points** collected in the  
274 field or information from the drone's onboard GPS sensor (Supplement section 4.2). We  
275 track visual features in each frame to estimate local camera movement between anchor  
276 frames allowing us to calculate the camera position for every frame in the video (Supplement  
277 section 4.3). We then transform animal positions from the pixel coordinates of the frames  
278 into the geographic coordinates of the 3D model by projecting rays from the estimated

279 camera location to the surface of the landscape model (Supplement section 4.4). In our  
280 examples, this method yields movement trajectories with sub-meter mean and median error  
281 (Fig. 3E); we provide a GUI that allows the user to efficiently assess the accuracy of their  
282 own track locations (Supplement section 4.5).

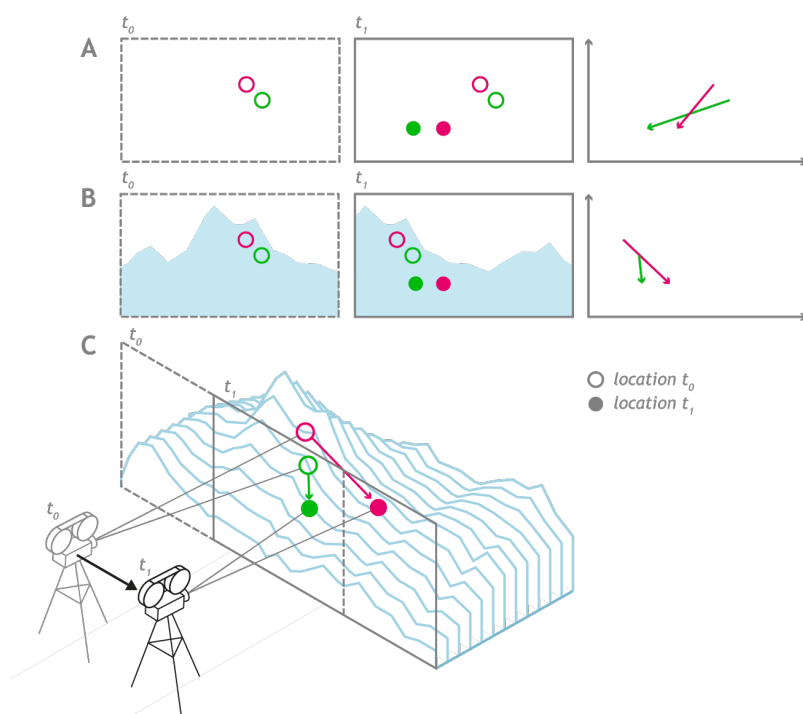

283

284 **Figure 4. Both camera position and landscape topography are necessary to generate accurate**  
285 **trajectories from locations extracted from 2D images.** A) At the end of Step 3 in the data  
286 extraction pipeline, we have linked detections across frames to generate trajectories for individual  
287 animals in the pixel-based coordinate space of the video frames. These trajectories do not distinguish  
288 between camera movement and animal movement, and thus changes in animal positions across  
289 frames (here from t<sub>0</sub> to t<sub>1</sub>) do not accurately represent animal movements in the real world. B) By  
290 incorporating landscape features in the background of the video frames we calculate each frame's  
291 relative camera position and so disentangle camera movement from animal movement. C) By  
292 combining camera location information with the 3D topography of the environment, we can  
293 reconstruct accurate movement trajectories in 3D space. Without a model of the landscape structure,  
294 the user must assume a flat earth, which introduces error into trajectories.

295

296 *Step 5. Body-part Keypoint Detection*

297

298 A major advantage of image-based techniques is that each image contains much more  
299 behaviorally-relevant information than does position alone. If the video resolution is  
300 sufficient, the user can, for example, use existing tools for markerless pose estimation (e.g.  
301 SLEAP (Pereira et al., 2020), DeepLabCut (Mathis et al., 2018; Nath et al., 2019),  
302 DeepPoseKit (Graving et al., 2019)) to extract positions of user-defined body parts on each  
303 detected animal, generating time-varying postural information for tracked individuals (Step 5  
304 in the Supplement; Fig. 5B). Such postural data are particularly amenable to automated  
305 behavioral annotation, and other downstream tasks, because the user can pair the  
306 (relatively) low dimensional keypoint information with human verified annotations from the  
307 raw video.



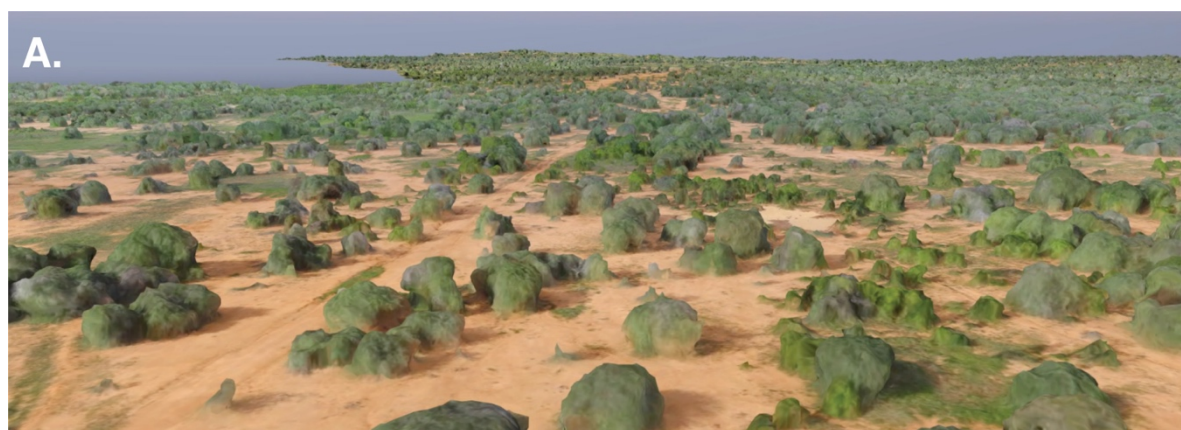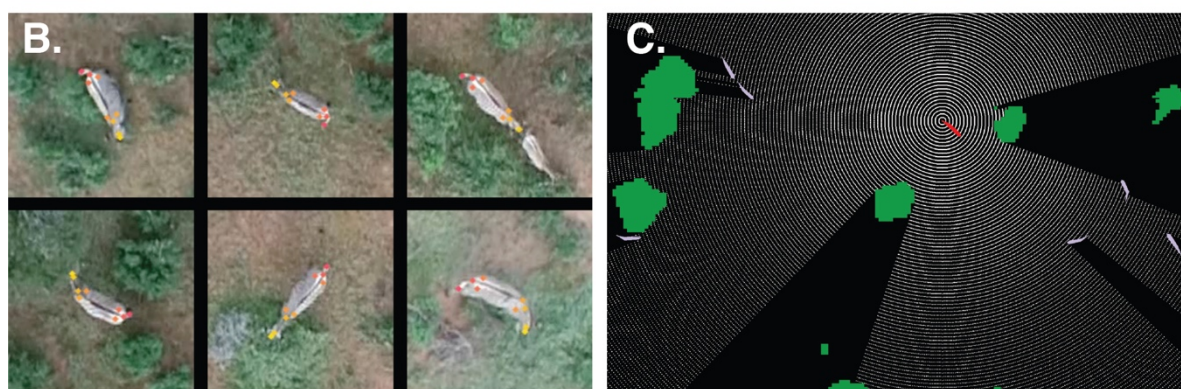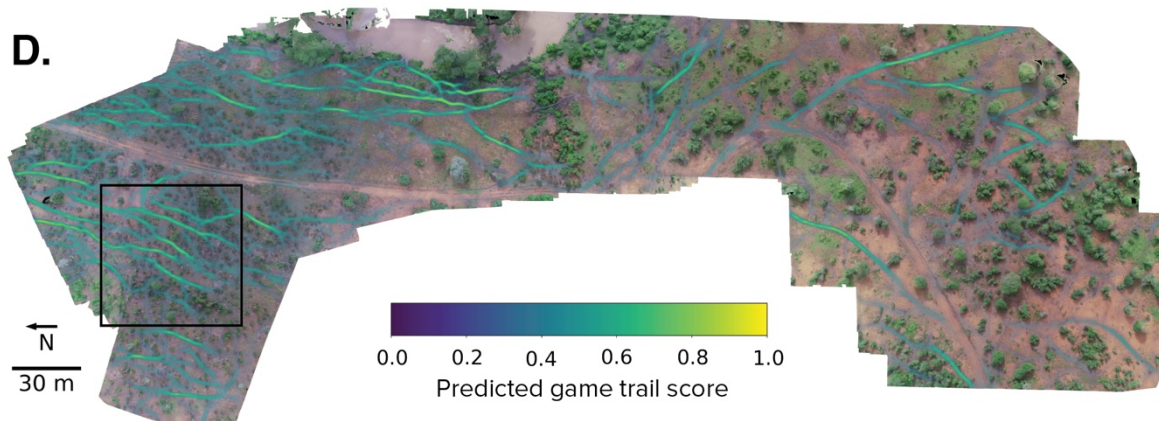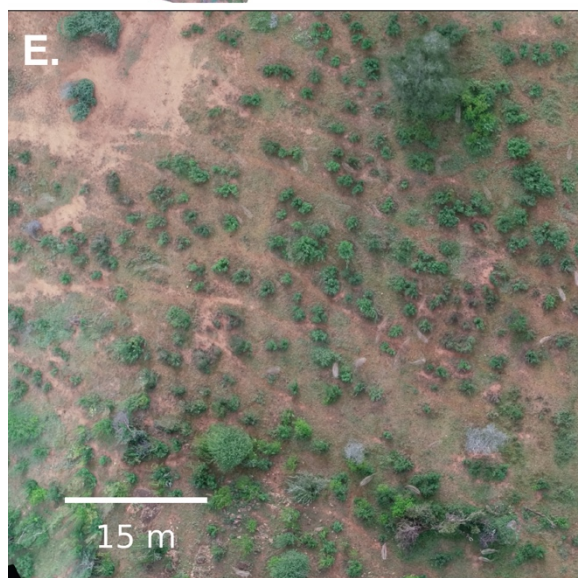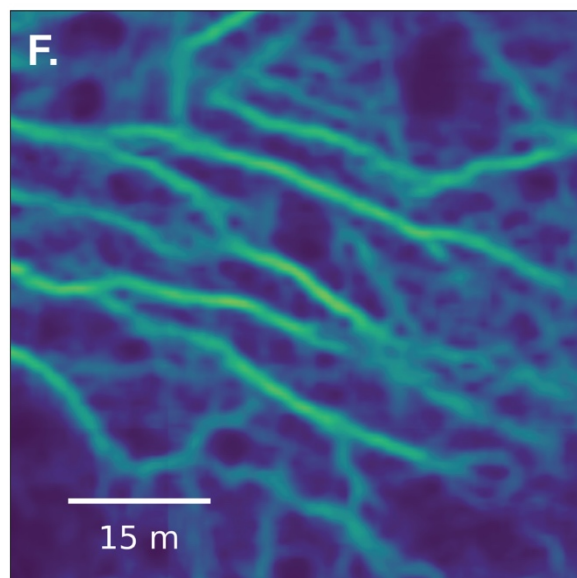

309 **Figure 5. Additional landscape and behavioral data generated beyond animal location.** A) An  
310 SfM-generated 3D triangular mesh landscape model. B) Examples of keypoints detected on zebras.  
311 Nine user-defined keypoints (snout, head, base of the neck, left and right shoulder, left and right  
312 hindquarters, tail base and tip of the tail) are tracked using DeepPoseKit (Graving et al. 2019). C)  
313 Combining landscape data and animal body and head location allows the visualization of animal's  
314 visual fields in their landscapes. Here, the red object is the focal zebra, the white rays show its visual  
315 field, and the green and white polygons represent bushes and conspecifics, respectively. D) A SfM-  
316 generated 2D orthomosaic image showing predicted game trail presence score. Predictions are  
317 generated by a CNN trained on separate orthomosaics that were annotated by three independent  
318 human annotators. See worked examples for more detail. The black box indicates the area shown in  
319 E and F, which provide detailed views of the orthomosaic and the game trail predictions, respectively.  
320 The color bar applies to both D and F.

321

### 322 *Step 6. Landscape Quantification*

323

324 The SfM software used in Step 4 generates multiple forms of landscape data that provide  
325 valuable environmental context for the behavior of the observed individuals, including 2D  
326 rasters encoding elevation data, **orthomosaic images**, and 3D **point clouds** and  
327 **triangular meshes** (Fig. 5A, E). These outputs can be used directly or further processed to  
328 extract information regarding local landscape features and topography, classify habitat  
329 types, or even estimate the visual fields of tracked animals. In the ungulate worked example  
330 we apply pixel-wise classification algorithms, known as **semantic segmentation**, to  
331 orthomosaic images to automatically detect game trails, which we expect will influence  
332 animal movement (Fig. 5D, F). Further possibilities are explored in the section *Analysis,*  
333 *Extensions, & Applications.*

334

### 335 **Limitations and Considerations**

336

337 Here we discuss the logistics of using drones to capture behavioral data, the suitability of  
338 different research questions to this approach, and the coding skills necessary to implement  
339 this method. For required computing resources, please see the Supplement.

340

341 *Ethical, logistical and legal considerations*

342

343 It is important to consider the potential impact of the drone on the focal animals when  
344 planning future research. Behavioral and physiological responses to drone flights can  
345 negatively impact wildlife (Ditmer et al., 2015; Weimerskirch et al., 2018), and may lead to  
346 biased or misleading results in behavioral studies (Duporge et al., 2021). Most species that  
347 respond to drones seem to be primarily affected by the sound of the drone (Duporge et al.,  
348 2021; McEvoy et al., 2016). Pilots may be able to reduce disturbance by choosing quieter  
349 drone models, using low-noise propellers, launching the drone far away from target animals,  
350 approaching from downwind, and flying at higher altitudes. While still an emerging field of  
351 study, Duporge et al. (2021) and others (Bevan et al., 2018; Christiansen et al., 2016;  
352 Mulero-Pázmány et al., 2017) offer guidelines for flying drones near a variety of species. It is  
353 typically prudent to perform preliminary flights prior to data collection in order to assess the  
354 animals' response to the drone and establish appropriate protocols.

355 When choosing a study environment, factors such as extreme temperatures, dust,  
356 wind, precipitation and fog can reduce visibility, equipment longevity and flight performance.  
357 Furthermore, landscapes (such as open water and snow fields) without abundant and  
358 persistent visible landmarks are not suitable for SfM methods, and may preclude  
359 transformation of animal trajectories into geographic coordinates (Step 4). SfM height  
360 mapping accuracy is also sensitive to vegetation structure and motion (such as tall grass in  
361 the wind), which may introduce errors in those parts of the landscape relative to static  
362 regions (D'Urban Jackson et al., 2020). Additionally, the real-world geospatial accuracy of  
363 the final data is ultimately determined by the quality of the 3D landscape models. For sub-  
364 meter accuracy one must either be able to place ground control points in the landscape of  
365 interest or have access to existing georeferenced landscape models or imagery.



366 Finally, researchers must be aware of and abide by legal regulations regarding drone  
367 operations in any prospective study area both in terms of formal permissions and licenses  
368 required to deploy drones as well as limitations on in-flight maneuvers. Particular rules vary  
369 by location and are continually evolving but can include limits on flight altitudes, distances, or  
370 locations (i.e. airports, national parks, or certain government areas) and requirements for  
371 maintaining visual contact with drones and keeping safe distances from people and  
372 structures. Beyond legal requirements, researchers should also ensure that projects do not  
373 negatively impact local communities. For a thorough discussion of ethical drone use, see  
374 Duffy et al. (2018).

375

#### 376 *Research question suitability*

377

378 In determining whether image-based data collection is appropriate for a research  
379 question, researchers should consider the required data resolution and spatial and temporal  
380 scales of all targeted study behaviors. Animal groups that are spread over large areas may  
381 be impossible to fully capture at an appropriate resolution, especially if automated tracking  
382 or individual posture data are required. Deploying multiple drones simultaneously can  
383 increase spatial coverage, but complicates flight protocols and data processing. Additionally,  
384 spatially-expansive behaviors like long-distance hunts may draw the drone beyond the legal  
385 operation distance from stationary pilots (Creel & Creel, 1995). Nocturnal or crepuscular  
386 animals would require imaging via thermal or high-sensitivity cameras, which imposes  
387 further constraints to the spatial, and temporal, resolution of video that can be obtained.

388 The timescale over which behaviors occur is also important. Drone battery efficiency  
389 has rapidly improved over the years, but flight times are still relatively short (currently 30-45  
390 minutes for widely-used models). While observation time can be extended with multiple  
391 sequential flights, the duration of observations are still limited by battery supply, pilot fatigue,  
392 and the movement of the focal animals away from the operational site. Similar to direct

393 observation, recording rare or unpredictable behaviors, such as predation events, requires  
394 deploying drones in the right place at the right time. Incorporating external observational or  
395 biologging data could help predict such behaviors and inform the location and timing of  
396 deployments. Relatedly, deploying a small number of geolocators on individuals in the target  
397 population could allow researchers to more reliably locate rare species or repeatedly target  
398 focal individuals and associated conspecifics for drone-based observation.

399

#### 400 *Programming proficiency*

401

402 All code provided in the worked examples is written in the Python programming language.  
403 We expect limited additional programming will be required to apply this code to new datasets  
404 that are similar in scope to the examples. However, we expect many researchers will want to  
405 adapt our base code to better suit their needs, which will require some degree of  
406 programming skill, depending on the functionality required. Furthermore, since this method  
407 generates large volumes of high-resolution and high-dimensional data, certain programming  
408 capabilities will prove essential for effective visualization and analysis (see below for  
409 possible analysis directions).

410

#### 411 **Analysis, Extensions, & Applications**

412

413 With recent advances in imaging technology and video analysis, drone-based behavioral  
414 observation is poised to become a widely-used approach in the study of wildlife ecology.  
415 Here we expand on the potential of this approach by outlining possible data analysis  
416 approaches as well as future extensions and applications of drone-based observation.

417

#### 418 *Data analysis*

419



420 Our method provides a rich set of biologically-relevant features, but these data must  
421 be analyzed to address the research questions of interest. There exists a rich body of  
422 literature for exploring, visualizing, and analyzing animal trajectory data (Patterson et al.,  
423 2017; Seidel et al., 2018). The sub-second and sub-meter animal positions and detailed  
424 landscape data produced by this method allows researchers to use step-selection-type  
425 approaches to evaluate movement decisions across spatial and temporal scales, from actual  
426 individual steps to movement decisions at larger-scales (Fieberg et al., 2021). Tracking body  
427 keypoint locations (Step 5) can directly provide information about behaviorally-relevant body  
428 parts, such as head direction and body orientation. Depending on the position of the  
429 animal(s) within each frame, correctly interpreting animals' relative keypoint patterns may  
430 require taking lens geometry into account (see Supplement for details). When possible to  
431 estimate, this head and body information can be combined with the 3D landscape models  
432 (Step 4) to reconstruct estimates of each animal's visual field (Aben et al., 2018). These can  
433 provide a valuable estimate of the social and non-social information available to animals,  
434 and how they use this information to make decisions such as whom to follow (Strandburg-  
435 Peshkin et al., 2013) or how to respond to possible threats (Davies et al., 2016; Rosenthal et  
436 al., 2015; Sosna et al., 2019).

437

#### 438 *Future extensions*

439

440 During detection (Step 2), if given sufficient image resolution, it may be possible to  
441 visually identify individual animals within and across observations. Individual recognition  
442 opens the door to studies of individual behavioral variation across time and contexts, and the  
443 role of individual behavior in driving processes at the population and community levels  
444 (Costa-Pereira et al., 2022). Beyond laboratory settings (Walter & Couzin, 2021) individual  
445 recognition in wild populations is increasingly feasible (Norman et al., 2017; Tuia et al.,  
446 2022). Alternatively, individuals could be identified using ground-level photographs or direct

447 observation, and then these identities could be manually linked to individuals in the aerial  
448 recordings.

449 A further advance would be to use temporal keypoint data, or body posture  
450 trajectories (Fig. 1 - Step 5), to define finescale behavioral labels. While similar to the  
451 problem of accelerometer-based behavioral classification, a vision-based approach provides  
452 the added benefit of ground-truth videos for validation (Brown et al., 2013; Wang et al.,  
453 2015). Both supervised (Bohnslav et al., 2021) and unsupervised/self-supervised (Berman et  
454 al., 2014) approaches, or a combination of both (Sun et al., 2021), could be applied to  
455 achieve automated behavioral annotations describing the behavioral states of individuals  
456 and groups.

457 Beyond data processing, advancements with drones' on board automated visual  
458 tracking (Islam et al., 2019) and the ability to automatically coordinate flight among multiple  
459 drones (Zhou et al., 2022) could help to streamline complex operations, reduce the risk of  
460 human error, and also facilitate further observation techniques such as multiview 3D posture  
461 tracking (Tallamraju et al., 2019). Drones could thus be deployed to autonomously find and  
462 record individuals of a target species. While these are exciting future steps, current  
463 regulations in many countries would prevent the use of these methods without special  
464 permissions or certifications. Thus, regulatory rather than technological restrictions may be  
465 the most substantial barriers to large-scale automated observation.

466

#### 467 *Synergizing with other remote-sensing methods*

468

469 There is great potential in combining this approach with existing remote sensing  
470 methods. In the context of biologging, drones could be deployed at key times or locations of  
471 interest to provide high-resolution behavioral snapshots of tagged individuals along with their  
472 social and environmental context. Image-based data could also be used to guide biologging  
473 study design choices. For example, one could downsample the high resolution image-based

474 data to determine the optimal sampling frequency for bio-logging studies, using the videos to  
475 verify that the resulting data capture the target behaviors. Recording and quantifying the  
476 behavior of instrumented animals could also aid in the development of behaviorally activated  
477 “smart” sensors (Korpela et al., 2020; Yu, 2021).

478         The geolocated animal movement and environmental data generated by drone-  
479 based methods can be combined with multi-modal remote sensing data (which is typically  
480 acquired over a broad scale, but at substantially-lower resolution) to explore the interplay  
481 between animals and important environmental features. For example, SfM models can be  
482 combined with remote sensing data to enable calculation of microclimate variability (Maclean  
483 et al. 2019; Duffy et al. 2021) or water flow and saturation (Koci et al., 2020). Higher  
484 accuracy 3D landscape models, such as those generated by lidar imaging (D’Urban Jackson  
485 et al. 2020), could enable studies of herbivore impacts on vegetation via consumption or  
486 trampling effects, or allow higher precision visual field calculations in difficult-to-model  
487 environments like tall grass. Furthermore, integrating the 3D structure of landscapes with  
488 calibrated multi- or hyperspectral measures of landscape properties can produce maps of  
489 resource quality and accessibility for foraging studies (Jennewein et al. 2021).

490

## 491 **Conclusion**

492

493 We present a method that allows researchers to study animal behavior in its natural social  
494 and environmental context in a non-invasive and scalable way. Our approach is independent  
495 of specific species and can be deployed across a range of study systems making this a  
496 powerful and versatile tool for many researchers across fields. Importantly, as researchers  
497 work to understand the relationship between animals and their landscapes in a changing  
498 world, this method, which simultaneously records both at high resolution, is poised to be an  
499 important new way of observing the natural world.

500

| <b>Term</b>                    | <b>Definition</b>                                                                                                                                                                                                                                                                                                                                                                                     |
|--------------------------------|-------------------------------------------------------------------------------------------------------------------------------------------------------------------------------------------------------------------------------------------------------------------------------------------------------------------------------------------------------------------------------------------------------|
| active learning                | An approach related to model-assisted labeling wherein the researcher uses model-generated confidence scores to concentrate annotation effort on difficult examples.                                                                                                                                                                                                                                  |
| anchor frames                  | The subset of video frames in our method input into the structure from motion software to generate the 3D landscape model and camera location information.                                                                                                                                                                                                                                            |
| annotation                     | The process of labeling objects of interest in training imagery, for example by drawing bounding boxes around individual animals.                                                                                                                                                                                                                                                                     |
| bounding box                   | A rectangle enclosing an object of interest in an image. Bounding boxes can be drawn by the user as a form of annotation, or can be generated by detection models to denote the predicted location of an object of interest.                                                                                                                                                                          |
| graphical user interface (GUI) | A means of viewing or inputting data that relies on graphical elements (e.g. buttons) rather than coding inputs.                                                                                                                                                                                                                                                                                      |
| ground control point (GCP)     | Locations or landmarks with known real-world geographic coordinates. These points are used to georeference the landscape model generated from the anchor frames.                                                                                                                                                                                                                                      |
| image augmentation             | A technique for increasing the effective size of the training set by modifying each training image each time it is shown to the model. Modifications, including blurring, rotating, and adjusting contrast, and are intended to mimic the diversity of images in the entire dataset.                                                                                                                  |
| model-assisted labeling        | An iterative process where image annotation and model training are conducted in parallel. The user initially labels a small number of images and uses these to train an initial version of the model. This initial model is then used to generate annotations for the remaining images, which the user then confirms or corrects while also adding annotations for any animals that the model missed. |
| orthomosaic                    | Two-dimensional composite images generated by the SfM software that approximate the appearance of 3D structures from an overhead viewpoint.                                                                                                                                                                                                                                                           |
| point cloud                    | A set of 3D points often also containing a color value that can be used to represent landscapes or objects in space.                                                                                                                                                                                                                                                                                  |
| pretraining                    | A feature of many common deep learning models where the model has been initially trained on large datasets consisting of generic imagery of common scenes and objects. This allows the model to learn the basic, universal aspects of imagery before being fine-tuned on the user's specific dataset.                                                                                                 |
| semantic segmentation          | The process of labeling every pixel in an image as one of a set number of object classes.                                                                                                                                                                                                                                                                                                             |
| structure from motion (SfM)    | A technique for 3D reconstruction in which two-dimensional images from various overlapping viewpoints are used to define the geometry of                                                                                                                                                                                                                                                              |

|                 |                                                                                                                  |
|-----------------|------------------------------------------------------------------------------------------------------------------|
|                 | the target structure (here, the landscape surrounding the observed animals).                                     |
| triangular mesh | A 3D surface model created from a point cloud by connecting triads of points to create flat triangular surfaces. |

501 **Table 1. Glossary of terms.** Defined terms are bolded at first appearance in the text.

502

### 503 **Authors contributions**

504

505 Benjamin Koger, Blair Costelloe and Iain Couzin developed the idea and goals of the  
506 method. Benjamin Koger, Blair Costelloe and Jeffrey Kerby coordinated and conducted data  
507 collection. Benjamin Koger, Blair Costelloe, Adwait Desphande, Jacob Graving and Jeffrey  
508 Kerby curated the data. Benjamin Koger designed the analytical pipeline; wrote the code in  
509 the worked examples and performed all aspects of model development, including training  
510 and validation. Jacob Graving advised on the design, organization, and development of  
511 earlier versions of the code. Blair Costelloe and Iain Couzin provided supervision and  
512 secured financial support. Blair Costelloe, Iain Couzin and Jeffrey Kerby administered and  
513 contributed material resources to the project. Benjamin Koger and Blair Costelloe wrote the  
514 initial manuscript draft and prepared the figures. All authors edited and revised the  
515 manuscript and gave final approval for publication.

516

### 517 **Acknowledgements**

518

519 Figures 1 and 4 were created by Mike Costelloe. We thank Mike Costelloe, Sven Lauke and  
520 Felicitas Oehler for assistance with collecting and annotating the ungulate data. We thank  
521 Guassa Gelada Research Project field managers Odin Bernardo and Nate Redon for  
522 collecting the gelada drone data, and project directors, camp staff members, and the local  
523 community for their support. We thank Anne Scharf for sharing code used to plan DJI  
524 mapping flights. We thank Jean Luo and David Basili for contributions to early versions of

525 the game trail detection and track correction GUI. B.R.C. received support from the  
526 European Union's Horizon 2020 research and innovation program under the Marie  
527 Sklodowska-Curie grant agreement No. 748549. B.R.C. acknowledges support from the  
528 University of Konstanz's Investment Grant program. J.T.K acknowledges support from the  
529 Neukom Institute for Computational Science at Dartmouth College and the European  
530 Union's Horizon 2020 research and innovation program under the Marie Sklodowska-Curie  
531 grant agreement No. 754513 and the Aarhus University Research Foundation. B.K., I.D.C,  
532 J.M.G., B.R.C., and A.D. acknowledge support from the Deutsche Forschungsgemeinschaft  
533 (DFG, German Research Foundation) under Germany's Excellence Strategy – 'Centre for  
534 the Advanced Study of Collective Behaviour' EXC 2117-422037984. I.D.C gratefully  
535 acknowledges support from the Office of Naval Research (ONR) grant N00014-19-1-2556  
536 and the European Union's Horizon 2020 research and innovation program under the Marie  
537 Sklodowska-Curie grant agreement No. 860949. A.D. acknowledges the support by the  
538 Swiss National Science Foundation (Early PostDoc Fellowship: P2NEP3\_200190). J.M.G.  
539 and B.R.C. acknowledge support from NVIDIA Corporation's Academic Hardware Grant  
540 Program.

541

## 542 **Permissions and Ethics Statement**

543

544 We imported and operated drones in Kenya with permission from the Kenya Civil Aviation  
545 Authority (import permits: KCAA/RPA/PERMIT-2017-0006, KCAA/RPA/PERMIT-2017-0007,  
546 KCAA/RPA/PERMIT-2017-0008, KCAA/ASSR/RPA/PERMIT-0016,  
547 KCAA/ASSR/RPA/PERMIT-0017, KCAA/ASSR/RPA/PERMIT-0018; authorization numbers:  
548 KCAA/OPS/2117/4 Vol. 2 (80), KCAA/OPS/2117/4 Vol. 2 (81), KCAA/OPS/2117/5 (86),  
549 KCAA/OPS/2117/5 (87); operator certificate numbers: RPA/TP/0005, RPA/TP/0000-0009).

550 We conducted research in Kenya with permission from the Kenyan National Commission for  
551 Science, Technology and Innovation (research permits: NACOSTI/P/17/59088/15489,

552 NACOSTI/P/59088/21567) and in affiliation with the Kenya Wildlife Service. All research  
553 activities pertaining to the ungulate data, including drone operation, were performed with the  
554 knowledge and support of management and security staff at our field sites, OI Pejeta  
555 Conservancy and Mpala Research Centre. Data collection protocols for the ungulate data  
556 were reviewed and approved by Ethikrat, the independent ethics council of the Max Planck  
557 Society. All research activities pertaining to gelada monkeys, including drone operation,  
558 were undertaken with the knowledge and approval of the Guassa Community Conservation  
559 Area leadership and under the approval of a memorandum of understanding between the  
560 Ethiopian Wildlife Conservation Authority and the Guassa Gelada Research Project.

561

#### 562 **Data availability statement**

563

564 Code for the worked examples is available on GitHub at

565 <https://github.com/benkoger/overhead-video-worked-examples>. All data for the worked

566 examples are archived on EDMOND at

567 [https://edmond.mpdl.mpg.de/privateurl.xhtml?token=9c1a978a-21f3-4843-bebe-](https://edmond.mpdl.mpg.de/privateurl.xhtml?token=9c1a978a-21f3-4843-bebe-40c296bffc73)

568 [40c296bffc73](https://edmond.mpdl.mpg.de/privateurl.xhtml?token=9c1a978a-21f3-4843-bebe-40c296bffc73). DOIs and stable links to these resources will be generated upon final

569 acceptance of the manuscript.

570

#### 571 **References**

572

573 Aben, J., Pellikka, P., & Travis, J. M. J. (2018). A call for viewshed ecology: Advancing our

574 understanding of the ecology of information through viewshed analysis. *Methods in*

575 *Ecology and Evolution*, 9(3), 624–633. <https://doi.org/10.1111/2041-210X.12902>

576 Altmann, J. (1974). Observational study of behavior: Sampling methods. *Behaviour*, 49(3–4),

577 227–266. <https://doi.org/10.1163/156853974X00534>

- 578 Benitez-Paez, F., Brum-Bastos, V. da S., Beggan, C. D., Long, J. A., & Demšar, U. (2021).  
579 Fusion of wildlife tracking and satellite geomagnetic data for the study of animal  
580 migration. *Movement Ecology*, 9(1), 31. <https://doi.org/10.1186/s40462-021-00268-4>
- 581 Berman, G. J., Choi, D. M., Bialek, W., & Shaevitz, J. W. (2014). Mapping the stereotyped  
582 behaviour of freely moving fruit flies. *Journal of The Royal Society Interface*, 11(99),  
583 20140672. <https://doi.org/10.1098/rsif.2014.0672>
- 584 Bevan, E., Whiting, S., Tucker, T., Guinea, M., Raith, A., & Douglas, R. (2018). Measuring  
585 behavioral responses of sea turtles, saltwater crocodiles, and crested terns to drone  
586 disturbance to define ethical operating thresholds. *PLOS ONE*, 13(3), e0194460.  
587 <https://doi.org/10.1371/journal.pone.0194460>
- 588 Bohoslav, J. P., Wimalasena, N. K., Clausing, K. J., Dai, Y. Y., Yarmolinsky, D. A., Cruz, T.,  
589 Kashlan, A. D., Chiappe, M. E., Orefice, L. L., Woolf, C. J., & Harvey, C. D. (2021).  
590 DeepEthogram, a machine learning pipeline for supervised behavior classification  
591 from raw pixels. *ELife*, 10, e63377. <https://doi.org/10.7554/eLife.63377>
- 592 Brown, D. D., Kays, R., Wikelski, M., Wilson, R., & Klimley, A. (2013). Observing the  
593 unwatchable through acceleration logging of animal behavior. *Animal Biotelemetry*,  
594 1(1), 20. <https://doi.org/10.1186/2050-3385-1-20>
- 595 Brum-Bastos, V., Long, J., Church, K., Robson, G., de Paula, R., & Demšar, U. (2020).  
596 Multi-source data fusion of optical satellite imagery to characterize habitat selection  
597 from wildlife tracking data. *Ecological Informatics*, 60, 101149.  
598 <https://doi.org/10.1016/j.ecoinf.2020.101149>
- 599 Buhl, J., Sumpter, D. J. T., Couzin, I. D., Hale, J. J., Despland, E., Miller, E. R., & Simpson,  
600 S. J. (2006). From Disorder to Order in Marching Locusts. *Science*, 312(5778),  
601 1402–1406. <https://doi.org/10.1126/science.1125142>
- 602 Ceballos, G., Ehrlich, P. R., & Raven, P. H. (2020). Vertebrates on the brink as indicators of  
603 biological annihilation and the sixth mass extinction. *Proceedings of the National*



- 604 *Academy of Sciences*, 117(24), 13596–13602.
- 605 <https://doi.org/10.1073/pnas.1922686117>
- 606 Christiansen, F., Rojano-Doñate, L., Madsen, P. T., & Bejder, L. (2016). Noise levels of  
607 multi-rotor unmanned aerial vehicles with implications for potential underwater  
608 impacts on marine mammals. *Frontiers in Marine Science*, 3.  
609 <https://doi.org/10.3389/fmars.2016.00277>
- 610 Costa-Pereira, R., Moll, R. J., Jesmer, B. R., & Jetz, W. (2022). Animal tracking moves  
611 community ecology: Opportunities and challenges. *Journal of Animal Ecology*, 1365-  
612 2656.13698. <https://doi.org/10.1111/1365-2656.13698>
- 613 Creel, S., & Creel, N. M. (1995). Communal hunting and pack size in African wild dogs,  
614 *Lycaon pictus*. *Animal Behaviour*, 50(5), 1325–1339. [https://doi.org/10.1016/0003-](https://doi.org/10.1016/0003-3472(95)80048-4)  
615 [3472\(95\)80048-4](https://doi.org/10.1016/0003-3472(95)80048-4)
- 616 Davies, A. B., Tambling, C. J., Kerley, G. I. H., & Asner, G. P. (2016). Limited spatial  
617 response to direct predation risk by African herbivores following predator  
618 reintroduction. *Ecology and Evolution*, 6(16), 5728–5748.  
619 <https://doi.org/10.1002/ece3.2312>
- 620 Dell, A. I., Bender, J. A., Branson, K., Couzin, I. D., de Polavieja, G. G., Noldus, L. P. J. J.,  
621 Pérez-Escudero, A., Perona, P., Straw, A. D., Wikelski, M., & Brose, U. (2014).  
622 Automated image-based tracking and its application in ecology. *Trends in Ecology &*  
623 *Evolution*, 29(7), 417–428. <https://doi.org/10.1016/j.tree.2014.05.004>
- 624 Ditmer, M. A., Vincent, J. B., Werden, L. K., Tanner, J. C., Laske, T. G., Iuzzo, P. A.,  
625 Garshelis, D. L., & Fieberg, J. R. (2015). Bears show a physiological but limited  
626 behavioral response to unmanned aerial vehicles. *Current Biology*, 25(17), 2278–  
627 2283. <https://doi.org/10.1016/j.cub.2015.07.024>
- 628 Duffy, J. P., Cunliffe, A. M., DeBell, L., Sandbrook, C., Wich, S. A., Shutler, J. D., Myers-  
629 Smith, I. H., Varela, M. R., & Anderson, K. (2018). Location, location, location:

- 630 Considerations when using lightweight drones in challenging environments. *Remote*  
631 *Sensing in Ecology and Conservation*, 4(1), 7–19. <https://doi.org/10.1002/rse2.58>
- 632 Duporge, I., Spiegel, M. P., Thomson, E. R., Chapman, T., Lamberth, C., Pond, C.,  
633 Macdonald, D. W., Wang, T., & Klinck, H. (2021). Determination of optimal flight  
634 altitude to minimise acoustic drone disturbance to wildlife using species audiograms.  
635 *Methods in Ecology and Evolution*, 12(11), 2196–2207. [https://doi.org/10.1111/2041-](https://doi.org/10.1111/2041-210X.13691)  
636 210X.13691
- 637 D’Urban Jackson, T., Williams, G. J., Walker-Springett, G., & Davies, A. J. (2020). Three-  
638 dimensional digital mapping of ecosystems: A new era in spatial ecology.  
639 *Proceedings of the Royal Society B: Biological Sciences*, 287(1920), 20192383.  
640 <https://doi.org/10.1098/rspb.2019.2383>
- 641 Ehlers, L., Coulombe, G., Herriges, J., Bentzen, T., Sutor, M., Joly, K., & Hebblewhite, M.  
642 (2021). Critical summer foraging tradeoffs in a subarctic ungulate. *Ecology and*  
643 *Evolution*, 11(24), 17835–17872. <https://doi.org/10.1002/ece3.8349>
- 644 Fieberg, J., Signer, J., Smith, B., & Avgar, T. (2021). A ‘How to’ guide for interpreting  
645 parameters in habitat-selection analyses. *Journal of Animal Ecology*, 90(5), 1027–  
646 1043. <https://doi.org/10.1111/1365-2656.13441>
- 647 Flack, A., Nagy, M., Fiedler, W., Couzin, I. D., & Wikelski, M. (2018). From local collective  
648 behavior to global migratory patterns in white storks. *Science*, 360(6391), 911–914.  
649 <https://doi.org/10.1126/science.aap7781>
- 650 Flack, A., Schaeffer, P. J., Taylor, J. R. E., Müller, I., Wikelski, M., & Fiedler, W. (2020).  
651 Daily energy expenditure in white storks is lower after fledging than in the nest.  
652 *Journal of Experimental Biology*, jeb.219337. <https://doi.org/10.1242/jeb.219337>
- 653 Francisco, F. A., Nührenberg, P., & Jordan, A. (2020). High-resolution, non-invasive animal  
654 tracking and reconstruction of local environment in aquatic ecosystems. *Movement*  
655 *Ecology*, 8(1), 27. <https://doi.org/10.1186/s40462-020-00214-w>

- 656 Graving, J. M., Chae, D., Naik, H., Li, L., Koger, B., Costelloe, B. R., & Couzin, I. D. (2019).  
657 DeepPoseKit, a software toolkit for fast and robust animal pose estimation using  
658 deep learning. *ELife*, *8*, e47994. <https://doi.org/10.7554/eLife.47994>
- 659 Haalck, L., Mangan, M., Webb, B., & Risse, B. (2020). Towards image-based animal  
660 tracking in natural environments using a freely moving camera. *Journal of*  
661 *Neuroscience Methods*, *330*, 108455.  
662 <https://doi.org/10.1016/j.jneumeth.2019.108455>
- 663 Hughey, L. F., Hein, A. M., Strandburg-Peshkin, A., & Jensen, F. H. (2018). Challenges and  
664 solutions for studying collective animal behaviour in the wild. *Philosophical*  
665 *Transactions of the Royal Society B: Biological Sciences*, *373*(1746), 20170005.  
666 <https://doi.org/10.1098/rstb.2017.0005>
- 667 Inoue, S., Yamamoto, S., Ringhofer, M., Mendonça, R. S., Pereira, C., & Hirata, S. (2019).  
668 Spatial positioning of individuals in a group of feral horses: A case study using drone  
669 technology. *Mammal Research*, *64*(2), 249–259. <https://doi.org/10.1007/s13364-018->  
670 [0400-2](https://doi.org/10.1007/s13364-018-0400-2)
- 671 Islam, M. J., Hong, J., & Sattar, J. (2019). Person-following by autonomous robots: A  
672 categorical overview. *The International Journal of Robotics Research*, *38*(14), 1581–  
673 1618. <https://doi.org/10.1177/0278364919881683>
- 674 Jesmer, B. R., Merkle, J. A., Goheen, J. R., Aikens, E. O., Beck, J. L., Courtemanch, A. B.,  
675 Hurley, M. A., McWhirter, D. E., Miyasaki, H. M., Monteith, K. L., & Kauffman,  
676 Matthew. J. (2018). Is ungulate migration culturally transmitted? Evidence of social  
677 learning from translocated animals. *Science*, *361*(6406), 1023–1025.  
678 <https://doi.org/10.1126/science.aat0985>
- 679 Katz, Y., Tunstrøm, K., Ioannou, C. C., Huepe, C., & Couzin, I. D. (2011). Inferring the  
680 structure and dynamics of interactions in schooling fish. *Proceedings of the National*  
681 *Academy of Sciences*, *108*(46), 18720–18725.

- 682 <https://doi.org/10.1073/pnas.1107583108>
- 683 Kays, R., Crofoot, M. C., Jetz, W., & Wikelski, M. (2015). Terrestrial animal tracking as an  
684 eye on life and planet. *Science*, *348*(6240). <https://doi.org/10.1126/science.aaa2478>
- 685 Klarevas-Irby, J. A., Wikelski, M., & Farine, D. R. (2021). Efficient movement strategies  
686 mitigate the energetic cost of dispersal. *Ecology Letters*, *24*(7), 1432–1442.  
687 <https://doi.org/10.1111/ele.13763>
- 688 Koci, J., Sidle, R. C., Jarihani, B., & Cashman, M. J. (2020). Linking hydrological connectivity  
689 to gully erosion in savanna rangelands tributary to the Great Barrier Reef using  
690 structure-from-motion photogrammetry. *Land Degradation & Development*, *31*(1),  
691 20–36. <https://doi.org/10.1002/ldr.3421>
- 692 Korpela, J., Suzuki, H., Matsumoto, S., Mizutani, Y., Samejima, M., Maekawa, T., Nakai, J.,  
693 & Yoda, K. (2020). Machine learning enables improved runtime and precision for bio-  
694 loggers on seabirds. *Communications Biology*, *3*(1), 633.  
695 <https://doi.org/10.1038/s42003-020-01356-8>
- 696 Kuhn, H. W. (1955). The Hungarian Method for the assignment problem. *Naval Research*  
697 *Logistics Quarterly*, *2*, 83–97.
- 698 Loftus, J. C., Harel, R., Núñez, C. L., & Crofoot, M. C. (2022). Ecological and social  
699 pressures interfere with homeostatic sleep regulation in the wild. *ELife*, *11*, e73695.  
700 <https://doi.org/10.7554/eLife.73695>
- 701 Mathis, A., Mamidanna, P., Cury, K. M., Abe, T., Murthy, V. N., Mathis, M. W., & Bethge, M.  
702 (2018). DeepLabCut: Markerless pose estimation of user-defined body parts with  
703 deep learning. *Nature Neuroscience*, *21*(9), 1281–1289.  
704 <https://doi.org/10.1038/s41593-018-0209-y>
- 705 McEvoy, J. F., Hall, G. P., & McDonald, P. G. (2016). Evaluation of unmanned aerial vehicle  
706 shape, flight path and camera type for waterfowl surveys: Disturbance effects and  
707 species recognition. *PeerJ*, *4*. <https://doi.org/10.7717/peerj.1831>

- 708 Moll, R. J., Millspaugh, J. J., Beringer, J., Sartwell, J., & He, Z. (2007). A new ‘view’ of  
709 ecology and conservation through animal-borne video systems. *Trends in Ecology &*  
710 *Evolution*, 22(12), 660–668. <https://doi.org/10.1016/j.tree.2007.09.007>
- 711 Mulero-Pázmány, M., Jenni-Eiermann, S., Strebel, N., Sattler, T., Negro, J. J., & Tablado, Z.  
712 (2017). Unmanned aircraft systems as a new source of disturbance for wildlife: A  
713 systematic review. *PLOS ONE*, 12(6), e0178448.  
714 <https://doi.org/10.1371/journal.pone.0178448>
- 715 Murray, D. L., & Fuller, M. R. (2000). A critical review of the effects of marking on the biology  
716 of vertebrates. In L. Boitani & T. Fuller (Eds.), *Research Techniques in Animal*  
717 *Ecology: Controversies and Consequences* (pp. 15–64). Columbia University Press.
- 718 Naganuma, T., Tanaka, M., Tezuka, S., M.J.G. Steyaert, S., Tochigi, K., Inagaki, A., Myojo,  
719 H., Yamazaki, K., & Koike, S. (2021). Animal-borne video systems provide insight  
720 into the reproductive behavior of the Asian black bear. *Ecology and Evolution*,  
721 11(14), 9182–9190. <https://doi.org/10.1002/ece3.7722>
- 722 Nath, T., Mathis, A., Chen, A. C., Patel, A., Bethge, M., & Mathis, M. W. (2019). Using  
723 DeepLabCut for 3D markerless pose estimation across species and behaviors.  
724 *Nature Protocols*, 14(7), 2152–2176. <https://doi.org/10.1038/s41596-019-0176-0>
- 725 Norman, B. M., Holmberg, J. A., Arzoumanian, Z., Reynolds, S. D., Wilson, R. P., Rob, D.,  
726 Pierce, S. J., Gleiss, A. C., de la Parra, R., Galvan, B., Ramirez-Macias, D.,  
727 Robinson, D., Fox, S., Graham, R., Rowat, D., Potenski, M., Levine, M., Mckinney, J.  
728 A., Hoffmayer, E., ... Morgan, D. L. (2017). Undersea Constellations: The Global  
729 Biology of an Endangered Marine Megavertebrate Further Informed through Citizen  
730 Science. *BioScience*, 67(12), 1029–1043. <https://doi.org/10.1093/biosci/bix127>
- 731 Paszke, A., Gross, S., Massa, F., Lerer, A., Bradbury, J., Chanan, G., Killeen, T., Lin, Z.,  
732 Gimelshein, N., Antiga, L., Desmaison, A., Kopf, A., Yang, E., DeVito, Z., Raison, M.,  
733 Tejani, A., Chilamkurthy, S., Steiner, B., Fang, L., ... Chintala, S. (2019). PyTorch:

- 734 An Imperative Style, High-Performance Deep Learning Library. In H. Wallach, H.  
735 Larochelle, A. Beygelzimer, F. d'Alché-Buc, E. Fox, & R. Garnett (Eds.), *Advances in*  
736 *Neural Information Processing Systems 32* (pp. 8024–8035). Curran Associates, Inc.  
737 [http://papers.neurips.cc/paper/9015-pytorch-an-imperative-style-high-performance-](http://papers.neurips.cc/paper/9015-pytorch-an-imperative-style-high-performance-deep-learning-library.pdf)  
738 [deep-learning-library.pdf](http://papers.neurips.cc/paper/9015-pytorch-an-imperative-style-high-performance-deep-learning-library.pdf)
- 739 Patterson, T. A., Parton, A., Langrock, R., Blackwell, P. G., Thomas, L., & King, R. (2017).  
740 Statistical modelling of individual animal movement: An overview of key methods and  
741 a discussion of practical challenges. *ASTA Advances in Statistical Analysis*, *101*(4),  
742 399–438. <https://doi.org/10.1007/s10182-017-0302-7>
- 743 Pereira, T. D., Tabris, N., Li, J., Ravindranath, S., Papadoyannis, E. S., Wang, Z. Y., Turner,  
744 D. M., McKenzie-Smith, G., Kocher, S. D., Falkner, A. L., Shaevitz, J. W., & Murthy,  
745 M. (2020). *SLEAP: Multi-animal pose tracking* (p. 2020.08.31.276246).  
746 <https://doi.org/10.1101/2020.08.31.276246>
- 747 Raoult, V., Tosetto, L., & Williamson, J. E. (2018). Drone-based high-resolution tracking of  
748 aquatic vertebrates. *Drones*, *2*(4), 37. <https://doi.org/10.3390/drones2040037>
- 749 Rattenborg, N. C., Voirin, B., Cruz, S. M., Tisdale, R., Dell'Omo, G., Lipp, H.-P., Wikelski,  
750 M., & Vyssotski, A. L. (2016). Evidence that birds sleep in mid-flight. *Nature*  
751 *Communications*, *7*(1), 12468. <https://doi.org/10.1038/ncomms12468>
- 752 Ringhofer, M., Go, C. K., Inoue, S., S. Mendonça, R., Hirata, S., Kubo, T., Ikeda, K., &  
753 Yamamoto, S. (2020). Herding mechanisms to maintain the cohesion of a harem  
754 group: Two interaction phases during herding. *Journal of Ethology*, *38*(1), 71–77.  
755 <https://doi.org/10.1007/s10164-019-00622-5>
- 756 Rosenthal, S. B., Twomey, C. R., Hartnett, A. T., Wu, H. S., & Couzin, I. D. (2015).  
757 Revealing the hidden networks of interaction in mobile animal groups allows  
758 prediction of complex behavioral contagion. *Proceedings of the National Academy of*  
759 *Sciences*, *112*(15), 4690–4695. <https://doi.org/10.1073/pnas.1420068112>

- 760 Seidel, D. P., Dougherty, E., Carlson, C., & Getz, W. M. (2018). Ecological metrics and  
761 methods for GPS movement data. *International Journal of Geographical Information*  
762 *Science*, 32(11), 2272–2293. <https://doi.org/10.1080/13658816.2018.1498097>
- 763 Sosna, M. M. G., Twomey, C. R., Bak-Coleman, J., Poel, W., Daniels, B. C., Romanczuk, P.,  
764 & Couzin, I. D. (2019). Individual and collective encoding of risk in animal groups.  
765 *Proceedings of the National Academy of Sciences*, 116(41), 20556–20561.  
766 <https://doi.org/10.1073/pnas.1905585116>
- 767 Sprogis, K. R., Videsen, S., & Madsen, P. T. (2020). Vessel noise levels drive behavioural  
768 responses of humpback whales with implications for whale-watching. *ELife*, 9,  
769 e56760. <https://doi.org/10.7554/eLife.56760>
- 770 Strandburg-Peshkin, A., Farine, D. R., Couzin, I. D., & Crofoot, M. C. (2015). Shared  
771 decision-making drives collective movement in wild baboons. *Science*, 348(6241),  
772 1358–1361. <https://doi.org/10.1126/science.aaa5099>
- 773 Strandburg-Peshkin, A., Farine, D. R., Crofoot, M. C., & Couzin, I. D. (2017). Habitat and  
774 social factors shape individual decisions and emergent group structure during  
775 baboon collective movement. *ELife*, 6, e19505. <https://doi.org/10.7554/eLife.19505>
- 776 Strandburg-Peshkin, A., Twomey, C. R., Bode, N. W. F., Kao, A. B., Katz, Y., Ioannou, C.  
777 C., Rosenthal, S. B., Torney, C. J., Wu, H. S., Levin, S. A., & Couzin, I. D. (2013).  
778 Visual sensory networks and effective information transfer in animal groups. *Current*  
779 *Biology*, 23(17), R709–R711. <https://doi.org/10.1016/j.cub.2013.07.059>
- 780 Sun, J. J., Kennedy, A., Zhan, E., Anderson, D. J., Yue, Y., & Perona, P. (2021). Task  
781 Programming: Learning Data Efficient Behavior Representations. *2021 IEEE/CVF*  
782 *Conference on Computer Vision and Pattern Recognition (CVPR)*, 2875–2884.  
783 <https://doi.org/10.1109/CVPR46437.2021.00290>
- 784 Tallamraju, R., Price, E., Ludwig, R., Karlapalem, K., Bülthoff, H. H., Black, M. J., & Ahmad,  
785 A. (2019). Active Perception Based Formation Control for Multiple Aerial Vehicles.



- 786 *IEEE Robotics and Automation Letters*, 4(4), 4491–4498.
- 787 <https://doi.org/10.1109/LRA.2019.2932570>
- 788 Torney, C. J., Lamont, M., Debell, L., Angohiatok, R. J., Leclerc, L.-M., & Berdahl, A. M.
- 789 (2018). Inferring the rules of social interaction in migrating caribou. *Philosophical*
- 790 *Transactions of the Royal Society B: Biological Sciences*, 373(1746), 20170385.
- 791 <https://doi.org/10.1098/rstb.2017.0385>
- 792 Tuia, D., Kellenberger, B., Beery, S., Costelloe, B. R., Zuffi, S., Risse, B., Mathis, A., Mathis,
- 793 M. W., van Langevelde, F., Burghardt, T., Kays, R., Klinck, H., Wikelski, M., Couzin,
- 794 I. D., van Horn, G., Crofoot, M. C., Stewart, C. V., & Berger-Wolf, T. (2022).
- 795 Perspectives in machine learning for wildlife conservation. *Nature Communications*,
- 796 13(1), 792. <https://doi.org/10.1038/s41467-022-27980-y>
- 797 Tuytens, F. A. M., de Graaf, S., Heerkens, J. L. T., Jacobs, L., Nalon, E., Ott, S., Stadig, L.,
- 798 Van Laer, E., & Ampe, B. (2014). Observer bias in animal behaviour research: Can
- 799 we believe what we score, if we score what we believe? *Animal Behaviour*, 90, 273–
- 800 280. <https://doi.org/10.1016/j.anbehav.2014.02.007>
- 801 Walter, T., & Couzin, I. D. (2021). TRex, a fast multi-animal tracking system with markerless
- 802 identification, and 2D estimation of posture and visual fields. *ELife*, 10, e64000.
- 803 <https://doi.org/10.7554/eLife.64000>
- 804 Wang, Y., Nickel, B., Rutishauser, M., Bryce, C. M., Williams, T. M., Elkaim, G., & Wilmers,
- 805 C. C. (2015). Movement, resting, and attack behaviors of wild pumas are revealed by
- 806 tri-axial accelerometer measurements. *Movement Ecology*, 3(1), 2.
- 807 <https://doi.org/10.1186/s40462-015-0030-0>
- 808 Weimerskirch, H., Prudor, A., & Schull, Q. (2018). Flights of drones over sub-Antarctic
- 809 seabirds show species- and status-specific behavioural and physiological responses.
- 810 *Polar Biology*, 41(2), 259–266. <https://doi.org/10.1007/s00300-017-2187-z>
- 811 Williams, H. J., Taylor, L. A., Benhamou, S., Bijleveld, A. I., Clay, T. A., Grissac, S., Demšar,



- 812 U., English, H. M., Franconi, N., Gómez-Laich, A., Griffiths, R. C., Kay, W. P.,  
813 Morales, J. M., Potts, J. R., Rogerson, K. F., Rutz, C., Spelt, A., Trevail, A. M.,  
814 Wilson, R. P., & Börger, L. (2020). Optimizing the use of biologgers for movement  
815 ecology research. *Journal of Animal Ecology*, *89*(1), 186–206.  
816 <https://doi.org/10.1111/1365-2656.13094>
- 817 Williams, T. M., Wolfe, L., Davis, T., Kendall, T., Richter, B., Wang, Y., Bryce, C., Elkaim, G.  
818 H., & Wilmers, C. C. (2014). Instantaneous energetics of puma kills reveal advantage  
819 of felid sneak attacks. *Science*, *346*(6205), 81–85.  
820 <https://doi.org/10.1126/science.1254885>
- 821 Wu, Y., Kirillov, A., Massa, F., Lo, W.-Y., & Girshick, R. (2019). *Detectron2*.  
822 <https://github.com/facebookresearch/detectron2>
- 823 Yu, H. (2021). *An evaluation of machine learning classifiers for next-generation, continuous-*  
824 *ethogram smart trackers*. 14.
- 825 Zhao, Z.-Q., Zheng, P., Xu, S.-T., & Wu, X. (2019). Object Detection With Deep Learning: A  
826 Review. *IEEE Transactions on Neural Networks and Learning Systems*, *30*(11),  
827 3212–3232. <https://doi.org/10.1109/TNNLS.2018.2876865>
- 828 Zhou, X., Wen, X., Wang, Z., Gao, Y., Li, H., Wang, Q., Yang, T., Lu, H., Cao, Y., Xu, C., &  
829 Gao, F. (2022). Swarm of micro flying robots in the wild. *Science Robotics*, *7*(66),  
830 eabm5954. <https://doi.org/10.1126/scirobotics.abm5954>
